# Supplementary material
Source: PubMed Central journal article supplement (PMC4375505)
Supplement: supp_M114.620732_jbc.M114.620732-1.pdf [file supp_M114.620732_jbc.M114.620732-1.pdf]

Supplemental Data for:

Propofol Inhibits SIRT2 Deacetylase Through a Conformation-Specific, Allosteric Site\*

**Brian P. Weiser<sup>1,2</sup>, Roderic G. Eckenhoff<sup>1</sup>**

From the <sup>1</sup>Department of Anesthesiology & Critical Care and <sup>2</sup>Department of Pharmacology,  
University of Pennsylvania Perelman School of Medicine, Philadelphia, PA 19104

\*Running title: *Inhibition of SIRT2 by propofol*

To whom correspondence should be addressed: Roderic G. Eckenhoff, Department of  
Anesthesiology & Critical Care, University of Pennsylvania Perelman School of Medicine, 3620  
Hamilton Walk, Philadelphia, PA 19104, Tel.: (215) 662-3705; Fax: (215) 349-5078; E-mail:  
roderic.eckenhoff@uphs.upenn.edu

**Fig. S1.** Mass spectra of SIRT2 peptides photolabeled by AziPm. For all spectra, hypothetical fragment ions are listed in the tables, and their predicted positions are indicated on the spectra. Fragment ions that were identified on the spectra are colored in the ion tables. Only +1 fragment ions are shown. #Indicates a 216.0762 Da modification was detected; amino acid numbering is according to full-length rat SIRT2.

Peptide:  $^{131}\text{F.FALAKELY}^{\#}\text{PGQF.K}^{144}$

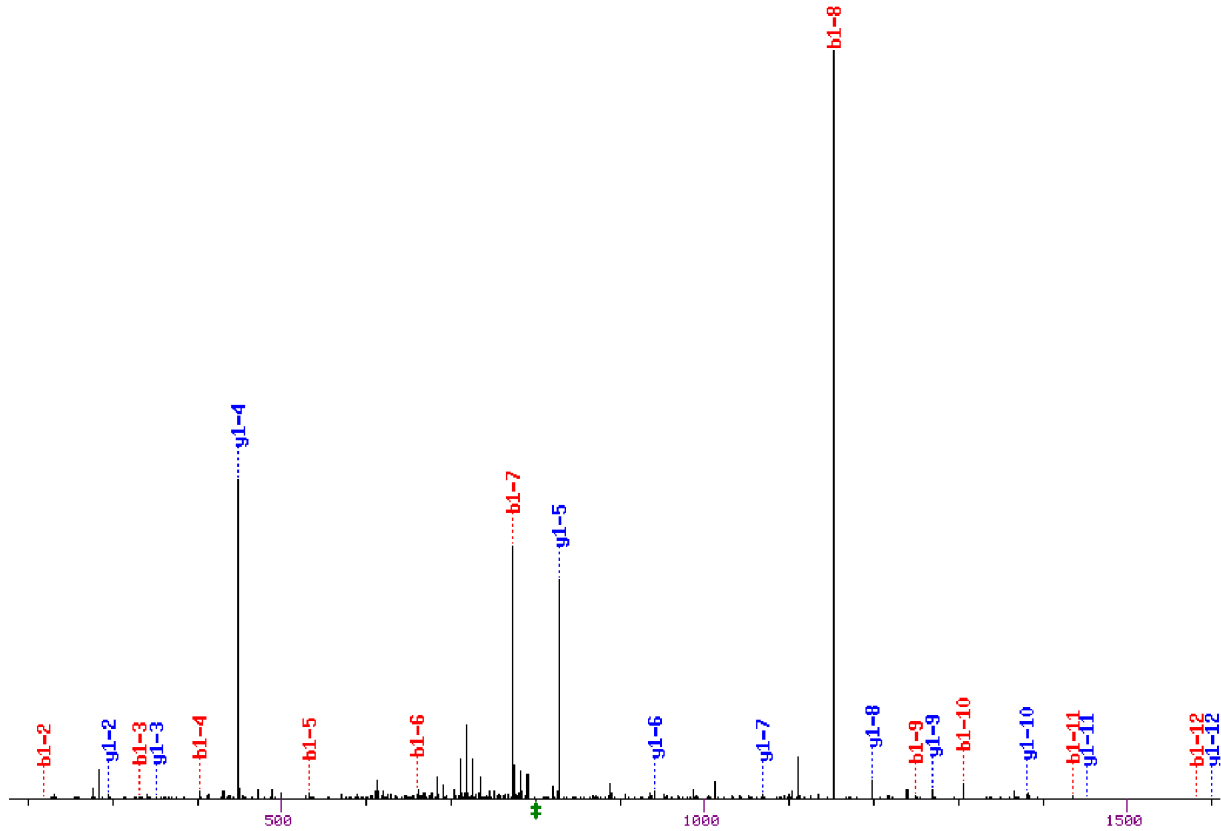

| Sequence | #  | b      | y      | #  |
|----------|----|--------|--------|----|
| F        | 1  | 148.1  | 1599.8 | 12 |
| A        | 2  | 219.1  | 1452.7 | 11 |
| L        | 3  | 332.2  | 1381.7 | 10 |
| A        | 4  | 403.2  | 1268.6 | 9  |
| K        | 5  | 531.3  | 1197.6 | 8  |
| E        | 6  | 660.4  | 1069.5 | 7  |
| L        | 7  | 773.5  | 940.4  | 6  |
| Y#       | 8  | 1152.6 | 827.4  | 5  |
| P        | 9  | 1249.6 | 448.2  | 4  |
| G        | 10 | 1306.7 | 351.2  | 3  |
| Q        | 11 | 1434.7 | 294.1  | 2  |
| F        | 12 | 1581.8 | 166.1  | 1  |

Peptide: <sup>132</sup>F.ALAKELY#PGQF.K<sup>144</sup>

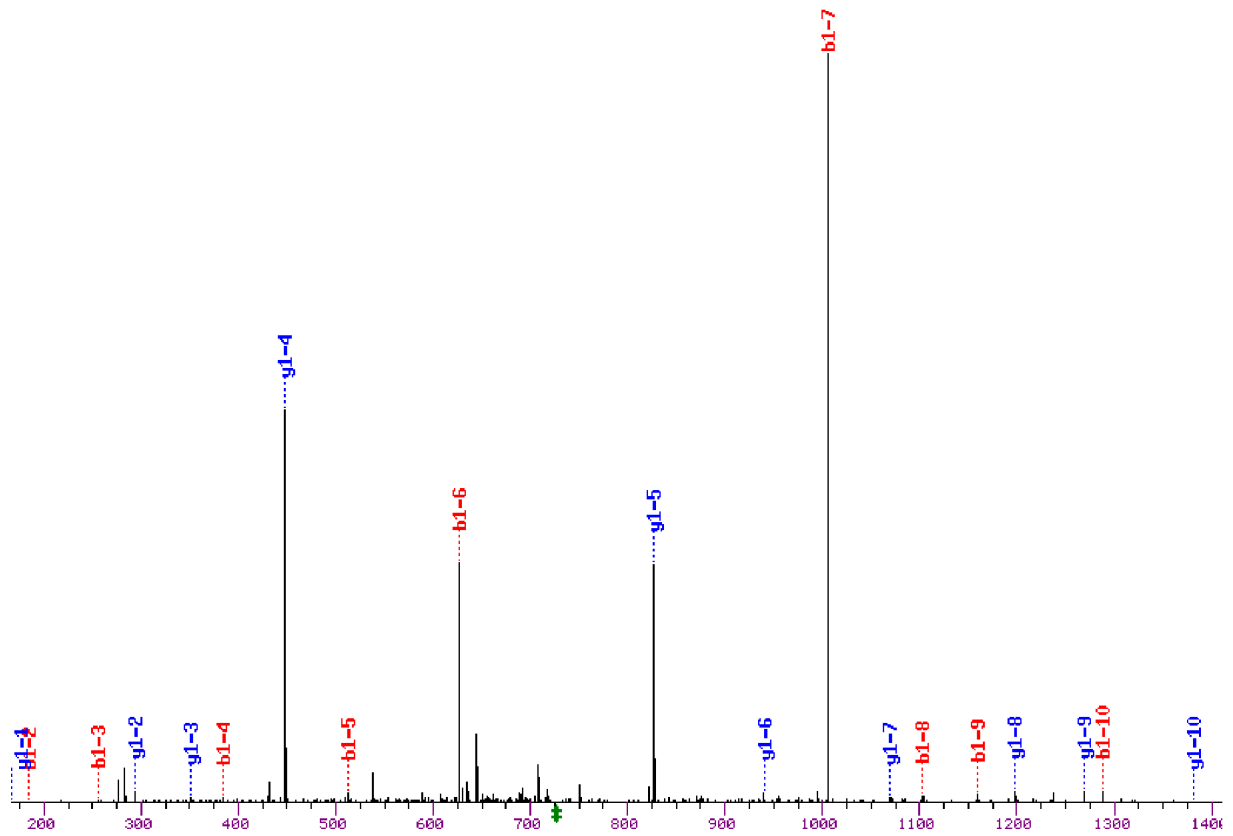

| Sequence | #  | b      | y      | #  |
|----------|----|--------|--------|----|
| A        | 1  | 72.0   | 1452.7 | 11 |
| L        | 2  | 185.1  | 1381.7 | 10 |
| A        | 3  | 256.2  | 1268.6 | 9  |
| K        | 4  | 384.3  | 1197.6 | 8  |
| E        | 5  | 513.3  | 1069.5 | 7  |
| L        | 6  | 626.4  | 940.4  | 6  |
| Y#       | 7  | 1005.5 | 827.4  | 5  |
| P        | 8  | 1102.6 | 448.2  | 4  |
| G        | 9  | 1159.6 | 351.2  | 3  |
| Q        | 10 | 1287.7 | 294.1  | 2  |
| F        | 11 | 1434.7 | 166.1  | 1  |

Peptide: <sup>134</sup>L.AKELY#PGQF.K<sup>144</sup>

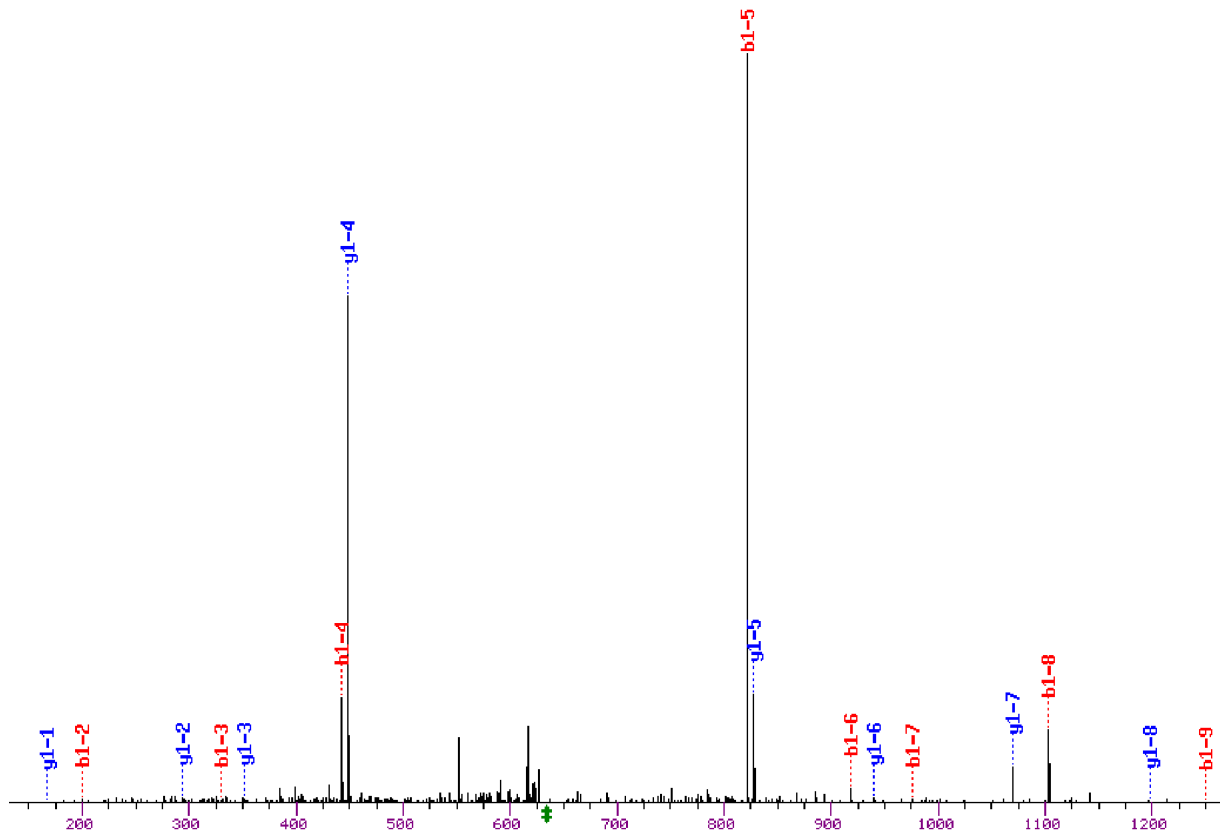

| Sequence | # | b      | y      | # |
|----------|---|--------|--------|---|
| A        | 1 | 72.0   | 1268.6 | 9 |
| K        | 2 | 200.1  | 1197.6 | 8 |
| E        | 3 | 329.2  | 1069.5 | 7 |
| L        | 4 | 442.3  | 940.4  | 6 |
| Y#       | 5 | 821.4  | 827.4  | 5 |
| P        | 6 | 918.5  | 448.2  | 4 |
| G        | 7 | 975.5  | 351.2  | 3 |
| Q        | 8 | 1103.5 | 294.1  | 2 |
| F        | 9 | 1250.6 | 166.1  | 1 |

Peptide:  $^{136}\text{K}.\text{ELY}\#\text{PGQFK}.\text{P}^{145}$

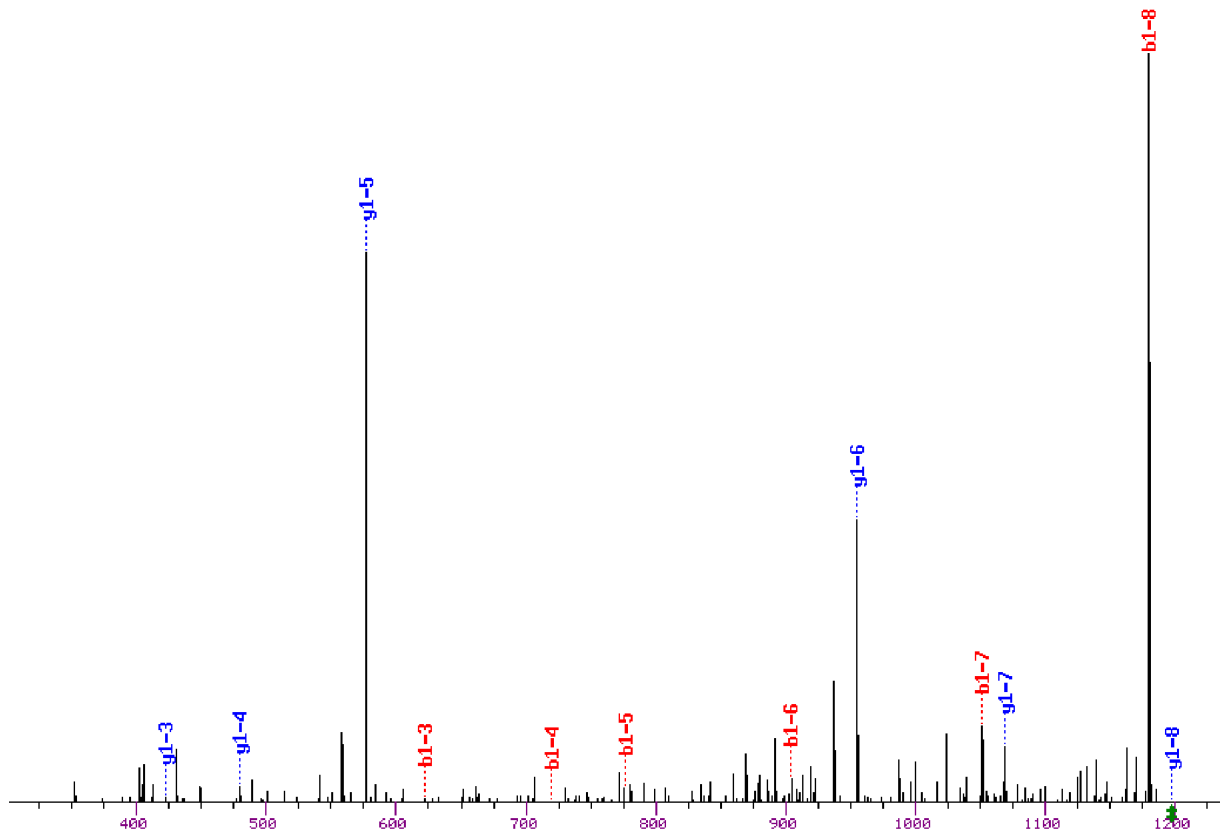

| Sequence | # | b      | y      | # |
|----------|---|--------|--------|---|
| E        | 1 | 130.1  | 1197.6 | 8 |
| L        | 2 | 243.1  | 1068.5 | 7 |
| Y#       | 3 | 622.3  | 955.5  | 6 |
| P        | 4 | 719.3  | 576.3  | 5 |
| G        | 5 | 776.3  | 479.3  | 4 |
| Q        | 6 | 904.4  | 422.2  | 3 |
| F        | 7 | 1051.5 | 294.2  | 2 |
| K        | 8 | 1179.6 | 147.1  | 1 |

Peptide: <sup>172</sup>L.ERVAGLEPQDLVEAHGTF#Y.T<sup>192</sup>

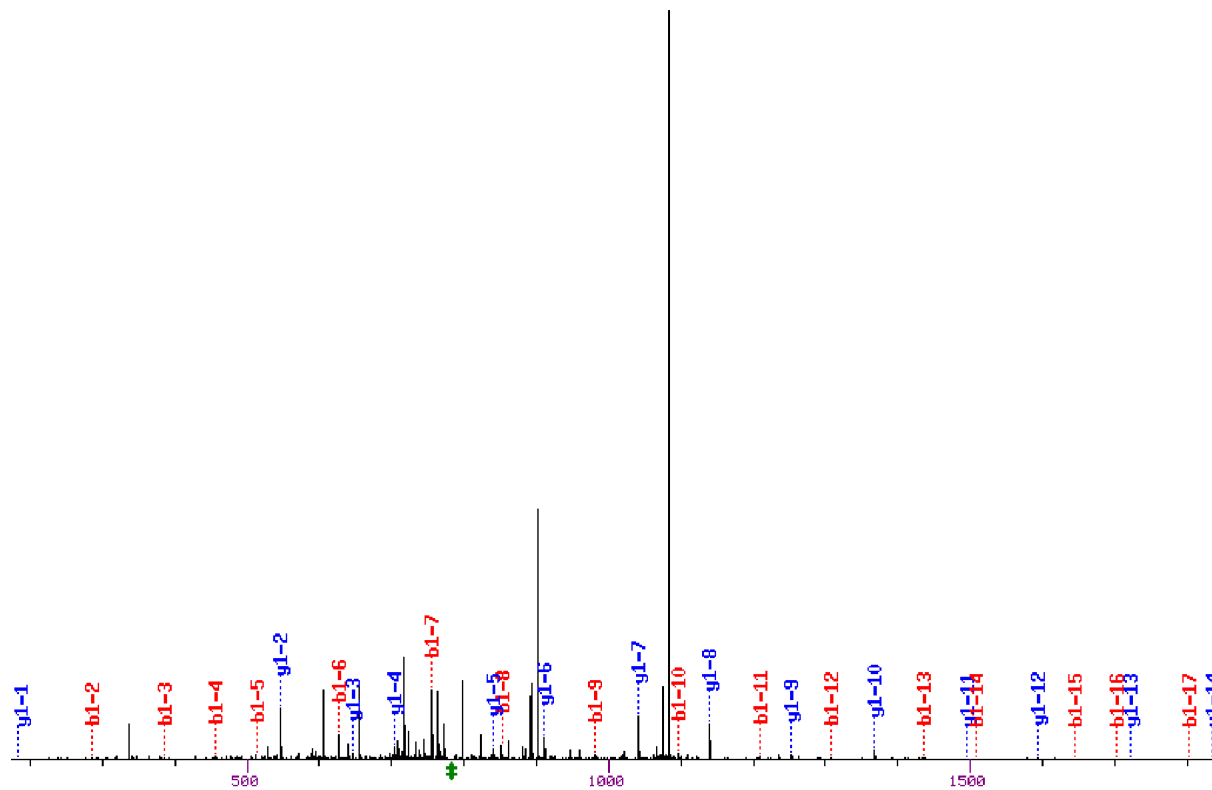

| Sequence | #  | b      | y      | #  |
|----------|----|--------|--------|----|
| E        | 1  | 130.1  | 2347.1 | 19 |
| R        | 2  | 286.2  | 2218.1 | 18 |
| V        | 3  | 385.2  | 2062.0 | 17 |
| A        | 4  | 456.3  | 1962.9 | 16 |
| G        | 5  | 513.3  | 1891.9 | 15 |
| L        | 6  | 626.4  | 1834.9 | 14 |
| E        | 7  | 755.4  | 1721.8 | 13 |
| P        | 8  | 852.5  | 1592.7 | 12 |
| Q        | 9  | 980.5  | 1495.7 | 11 |
| D        | 10 | 1095.5 | 1367.6 | 10 |
| L        | 11 | 1208.6 | 1252.6 | 9  |
| V        | 12 | 1307.7 | 1139.5 | 8  |
| E        | 13 | 1436.7 | 1040.4 | 7  |
| A        | 14 | 1507.8 | 911.4  | 6  |
| H        | 15 | 1644.8 | 840.4  | 5  |
| G        | 16 | 1701.9 | 703.3  | 4  |
| T        | 17 | 1802.9 | 646.3  | 3  |
| F#       | 18 | 2166.0 | 545.2  | 2  |
| Y        | 19 | 2329.2 | 182.0  | 1  |

note: the peaks at  $m/z = 902.0$  and  $1083.5$  are b17 and b18 +2 fragment ions, respectively

Peptide: <sup>202</sup>K.EYTM#SWMK.E<sup>211</sup>

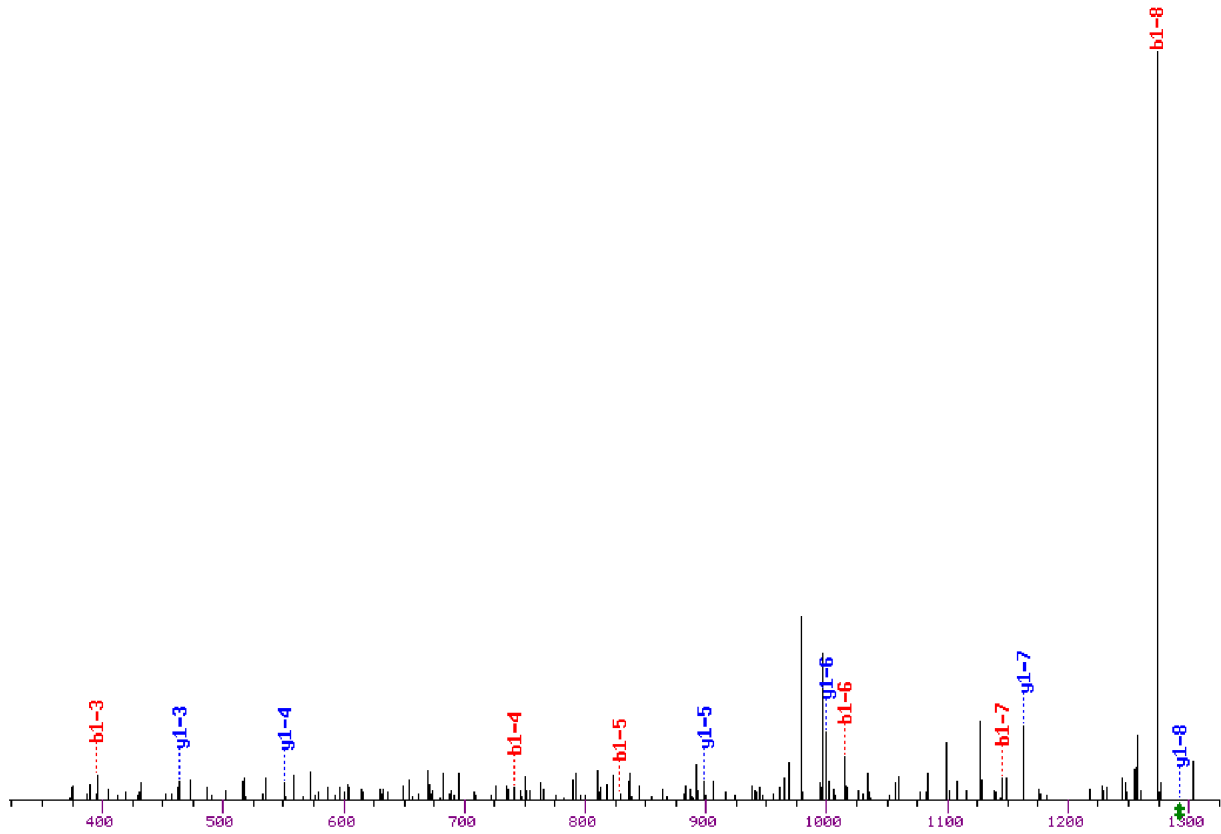

| Sequence | # | b      | y      | # |
|----------|---|--------|--------|---|
| E        | 1 | 130.1  | 1291.5 | 8 |
| Y        | 2 | 293.1  | 1162.5 | 7 |
| T        | 3 | 394.2  | 999.4  | 6 |
| M#       | 4 | 741.3  | 898.4  | 5 |
| S        | 5 | 828.3  | 551.3  | 4 |
| W        | 6 | 1014.4 | 464.2  | 3 |
| M        | 7 | 1145.4 | 278.2  | 2 |
| K        | 8 | 1273.5 | 147.1  | 1 |
